# Supplementary material for: Voltammetric Determination of 3-Methylmorphine Using Glassy Carbon Electrode Modified with rGO and Bismuth Film
Source: MDPI journal article supplement (doi:10.3390/bios12100860), 2022-10-12
Supplement: s1 [file s1]

## SUPPLEMENTARY MATERIAL

# **Voltammetric Determination of 3-Methylmorphine Using Glassy Carbon Electrode Modified with rGO and Bismuth Film**

**Ademar Wong <sup>1</sup>, Anderson M. Santos <sup>2</sup>, Camila A. Proença <sup>2</sup>, Thaísa A. Baldo <sup>2</sup>, Maria H. A. Feitosa <sup>2</sup>, Fernando C. Moraes <sup>2,\*</sup> and Maria D. P. T. Sotomayor <sup>1</sup>**

<sup>1</sup> Institute of Chemistry, State University of São Paulo (UNESP), 14801-970 Araraquara, Brazil

<sup>2</sup> Department of Chemistry, Federal University of São Carlos (UFSCar), 13560-970 São Carlos, Brazil

\* Correspondence: fcmoraes@ufscar.br

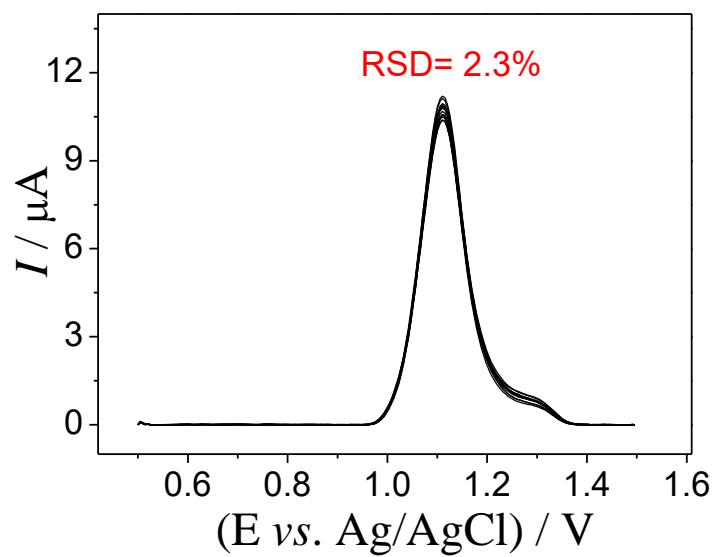

**Figure S1.** Repeatability study of 3-methylmorphine with the Bi-rGO-CTS/GCE sensor in 0.04 mol L<sup>-1</sup> Britton-Robinson (pH 4.0). SWV parameters:  $f = 15$  Hz,  $a = 50$  mV,  $\Delta E_s = 5$  mV.
